# Supplementary material
Source: HighWire-hosted journal article supplement (https://bibliotheek.ehb.be/content/suppl/2022/09/28/10.5.e002867)
Supplement: bmjdrc-2022-002867supp002_data_supplement.pdf [file bmjdrc-2022-002867supp002_data_supplement.pdf]

Supplementary Table 1 Variable extraction in general practice.

|                                      |                                                                                                                                                     |
|--------------------------------------|-----------------------------------------------------------------------------------------------------------------------------------------------------|
| <b>Variables</b>                     | <b>General practice:</b><br>All adults ( $\geq 18$ years) with a diagnosis of diabetes Jan. 1 <sup>st</sup> , 2012, to Dec. 31 <sup>st</sup> , 2014 |
| <b>Characteristics</b>               |                                                                                                                                                     |
| Diabetes duration                    | 2014 minus year of diagnosis                                                                                                                        |
| Height                               | If ever registered                                                                                                                                  |
| Weight                               | 15 months                                                                                                                                           |
| BMI                                  | 15 months                                                                                                                                           |
| Current smokers                      | No; if registered as non- smoker.<br>Yes; if registered as current smoker the last 5 years and not changed smoking status                           |
| <b>Vascular complications</b>        |                                                                                                                                                     |
| Coronary heart disease               | If ever registered                                                                                                                                  |
| Stroke                               | If ever registered                                                                                                                                  |
| Retinopathy                          | If ever registered                                                                                                                                  |
| PTA/foot ulcer/lower limb amputation | If ever registered                                                                                                                                  |
| <b>Processes of care</b>             |                                                                                                                                                     |
| HbA1c                                | 36 months                                                                                                                                           |
| Blood pressure                       | 15 months                                                                                                                                           |
| Lipids                               | 36 months                                                                                                                                           |
| Creatinine/eGFR                      | 36 months                                                                                                                                           |
| <b>Medication</b>                    |                                                                                                                                                     |
| Medication                           | Prescriptions 36 months                                                                                                                             |

Retinopathy: Non-proliferative and proliferative retinopathy.
